# Supplementary material for: Isolation and Functional Characterization of Soybean BES1/BZR1 Homolog 3-Like 1 (GmBEH3L1) Associated with Dehydration Sensitivity and Brassinosteroid Signaling in Arabidopsis thaliana
Source: MDPI journal article supplement (doi:10.3390/plants11192565), 2022-09-29
Supplement: s1 [file s1]

## Supplementary Materials

**Table S1. Primers used for qPCR, RT-PCR and gene cloning**

| qPCR and RT-PCR                               | Primer sequence (5' to 3')                                             |
|-----------------------------------------------|------------------------------------------------------------------------|
| <i>GmBEH3L1</i><br>( <i>Glyma_12G231500</i> ) | Forward: TCAGAGGGCATGGAGATAGT<br>Reverse: GAGTCCACATTGGCGAACCG         |
| <i>Glyma_13G266500</i>                        | Forward: CCACATTCTTCTTATAACAC<br>Reverse: GTTGTTTTCTCTCTCCTTCGA        |
| <i>GmACT11</i><br>( <i>Glyma_18G290800</i> )  | Forward: ATCTTGACTGAGCGTGGTTATTCC<br>Reverse: GCTGGTCCTGGCTGTCTCC      |
| <i>GmEFL1b</i><br>( <i>Glyma_02G276600</i> )  | Forward: ATGGCTGTCACCTTCTCAGA<br>Reverse: CATATCCCACAGGAACCAGT         |
| <i>Gm60S</i><br>( <i>Glyma_13G318800</i> )    | Forward: TCAACCGTATACCCCGGACA<br>Reverse: CTTCACTGCCTCCTTCAGCA         |
| <i>GmFBOX</i><br>( <i>Glyma_12G051100</i> )   | Forward: ACCAGGTCTCCTCTTACCGAA<br>Reverse: TGAGGTTCAAGGGACAAGCG        |
| <i>ACT8</i> ( <i>At1g49240</i> )              | Forward: CCTTGCTGGTCGTGACCTTACTGA<br>Reverse: CTCTCAGCACCGATCGTGATCACT |
| <i>ABF2</i> ( <i>At1g45249</i> )              | Forward: GAGGTCAAGAGGGTTTGCAG<br>Reverse: GAATTTGCAGTCTCTGCACC         |
| <i>ERD15</i> ( <i>At2g41430</i> )             | Forward: CCAGCGAAATGGGGAAACCA<br>Reverse: ACAAAGGTACAGTGGTGGC          |
| <i>MYB75</i> ( <i>At1g56650</i> )             | Forward: AGTATGGAGAAGGCAAATGG<br>Reverse: GTAGGAATGGGCGTAATGTC         |
| <i>P5CS1</i> ( <i>At2g39800</i> )             | Forward: CGACGGAGACAATGGAATTGT<br>Reverse: GATCAGAAATGTGTAGGTAGC       |
| <i>RAB18</i> ( <i>At5g66400</i> )             | Forward: CGATCCAGCAGCAGTATGAC<br>Reverse: TTCGAAGCTTAACGGCCACC         |
| <i>RD29B</i> ( <i>At5g52300</i> )             | Forward: CGTCCTTATGGTCATGAGC<br>Reverse: GCCTCATGTCCGTAAGAGG           |

|                                                                                       |                                                                                                                                     |
|---------------------------------------------------------------------------------------|-------------------------------------------------------------------------------------------------------------------------------------|
| <i>ARF4</i> ( <i>At5g60450</i> )                                                      | Forward: GCACACATGGAGGCTTCTCT<br>Reverse: ACCGAGGGATCAATCTCCCA                                                                      |
| <i>ARF8</i> ( <i>At5g37020</i> )                                                      | Forward: GCAGCAGCAATCAGAGATGC<br>Reverse: ATTCTGCGGATTTCCGGGT                                                                       |
| <i>BAS1</i> ( <i>At2g26710</i> )                                                      | Forward: GTAGCAGCTGGTTCATTCCA<br>Reverse: CAGGATCGGCTACCGTTAAC                                                                      |
| <i>BR6OX2</i> ( <i>At3g30180</i> )                                                    | Forward: CAACATAGCTGCGGTTCATG<br>Reverse: GTAACCCAACATGTCTGTGA                                                                      |
| <i>CPD</i> ( <i>At5g05690</i> )                                                       | Forward: CGAAGATCGGGTACCGTTTCTG<br>Reverse: CAAAGATGCTCGCACTTTCAAC                                                                  |
| <i>DWF4</i> ( <i>At3g50660</i> )                                                      | Forward: GCTGAGATCACCGGTAACAC<br>Reverse: CTCTCGCTATCTTCTTCTTGC                                                                     |
| <b>Gene cloning</b>                                                                   | <b>Primer sequence (5' to 3')</b>                                                                                                   |
| <i>GmBEH3L1</i><br>( <i>Glyma_12G231500</i> )<br>for complementary<br>transgenic line | Forward: GGGGACAAGTTTGTACAAAAAAGCAGGCTTCAT<br>GACGTCGGGGACGAGGCT<br>Reverse: GGGGACCACTTTGTACAAGAAAGCTGGGTCTCAT<br>CTGGTCTTTGAGTTAC |

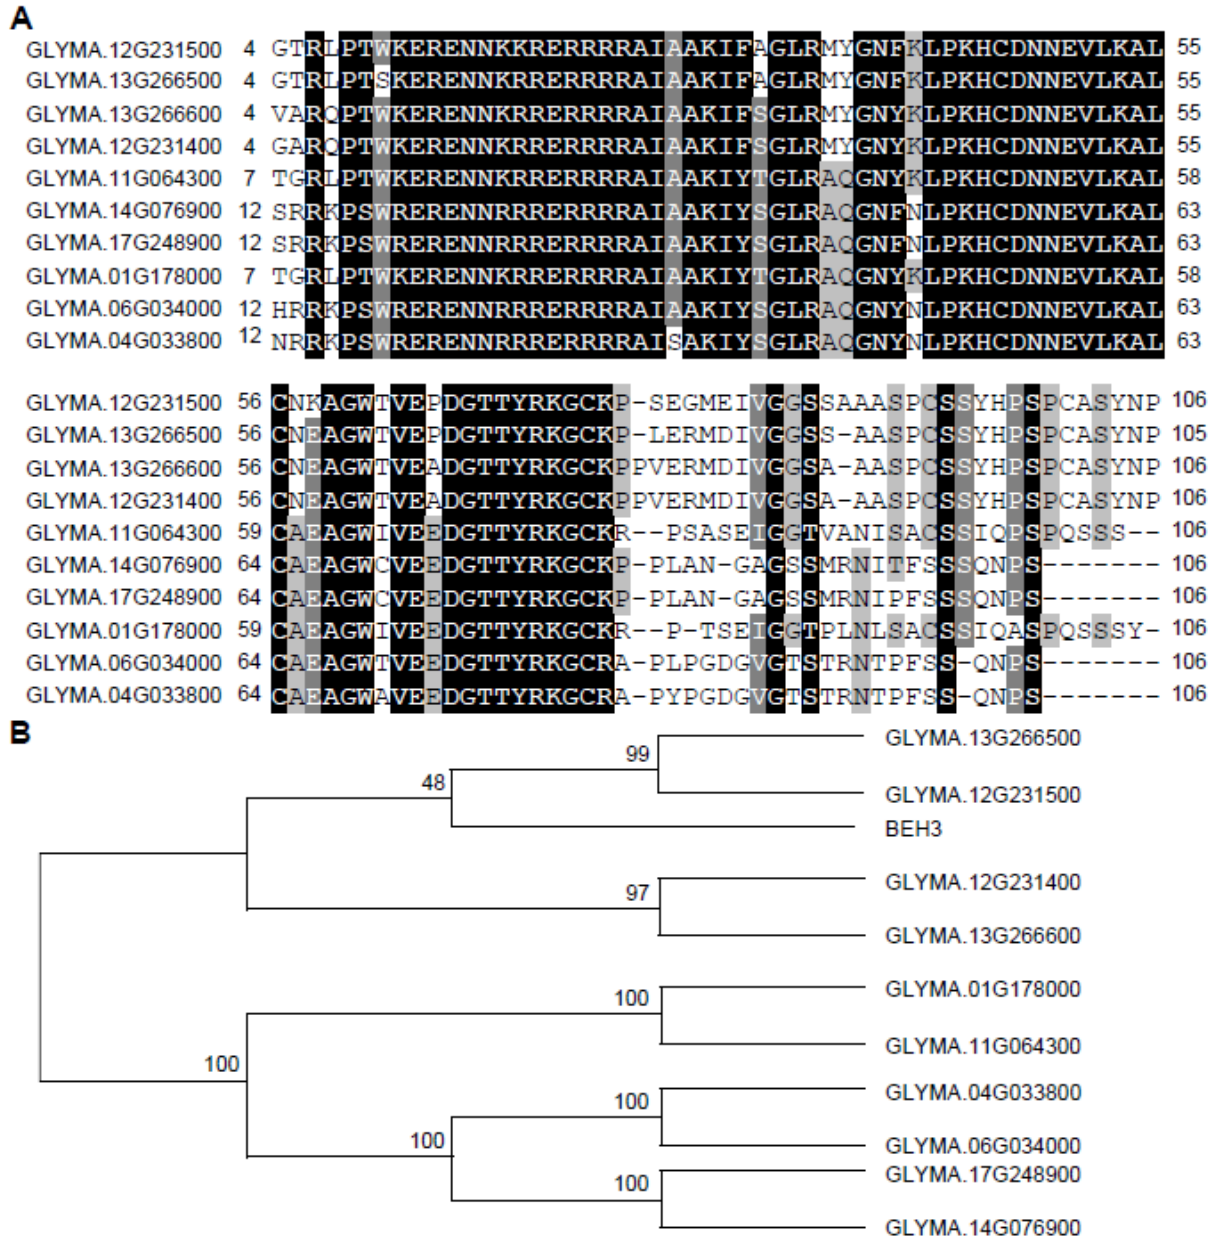

**Figure S1. Analysis of amino acid sequences of BES1-ND domain in BES1/BZR1 family homologous genes and phylogenetic relationship of BEH3 orthologs from soybean (*Glycine max*). (A) Alignment of BES1-ND domain sequences of GLYMA\_12G231500 and other BES1/BZR1 homolog genes from *G. max* species. Shown are the BES1-ND domain sequences of GLYMA\_12G231500, GLYMA\_13G266500, GLYMA\_13G266600, GLYMA\_12G231400, GLYMA\_11G064300, GLYMA\_14G076900, GLYMA\_17G248900, GLYMA\_01G178000, GLYMA\_06G034000, and GLYMA\_04G033800 (<https://phytozome-next.jgi.doe.gov>). Gray and black shading describe similar and identical amino acids, respectively. Gap (-) is introduced to optimize the amino acid sequence alignment. (B) Phylogenetic relationship of BEH3 orthologs from soybean (*G. max*). The bootstrap values are**

shown near the corresponding branch (MEGA-X program).

```

BEH3          1  MTSGTRLPPTTKERENNKKRERRRRRAATAAKIFAGLRITGDNFKLPKHCDNNEVLKALCNKAGWTVEEDGTTYRKGC
GLYMA.12G231500 1  MTSGTRLPPTTKERENNKKRERRRRRAATAAKIFAGLRITGDNFKLPKHCDNNEVLKALCNKAGWTVEEDGTTYRKGC
GLYMA.13G266500 1  MTSGTRLPPTTKERENNKKRERRRRRAATAAKIFAGLRITGDNFKLPKHCDNNEVLKALCNKAGWTVEEDGTTYRKGC

BEH3          75  KEMDRMDLNGS-TSASPCSSYQHSEFASYNPSFSS-----SFPSPTNPFCDNSLIPWLKNLSSNSFS---
GLYMA.12G231500 75  KPESEGMEIVGGSSAAASPCSSYHSPQASYNPSFGSS-----SPYYTQIPNFDNSLIPWLKNLSTASSSSASS
GLYMA.13G266500 75  KPELERMDIVGGS-SPASPCSSYHSEFASYNPSFGSSSFPSPSSSPYTTQIPNADNSLIPWLKNLSTASSSSASS

BEH3          139 -KLE---EEHCNSISAPVTPPI-----ARSP-----TRGCVT---TIDSG-----KLS
GLYMA.12G231500 143 PKLEHLYLHSGSISAPVTPPISSPTARTPRINAEWDEQSARPGPGWTRCCHYSELESSSPSPGRQVVDPEWFA
GLYMA.13G266500 148 PKLEHLYLHSGSISAPVTPPISSPTSRTPRINVEWDEQSARPG--WTRCCHYSELESSSPSPGRQVVDPEWFA

BEH3          175  GMQTEQSGPSSPTFSLVSRNPFFIKERAFKMGDCNSEFWTFQSGNCSPAIFAGVTONSDVPMADGMTREFAFGC
GLYMA.12G231500 217 GIKLEHVSPTSPTFSLVSSNPFAFKED-ALPSSGSEFWTFPAQSGTCSPAIFPGSYQNADIPMSDPAVSIEFAFGS
GLYMA.13G266500 220 GIKLEHVSPTSPTFSLVSSNPFAFKED-GLPGSGSEFWTFPAQSGTCSPAIFPGSYQNADIPMSDPAVSIEFAFGS

BEH3          249  NPMAAANGMVKPWEGERIHEECVSDDLELTLGNSRTR
GLYMA.12G231500 290 NML---GLVKPWEGERIHEEFGSDDLELTLGNSKTR
GLYMA.13G266500 293 NML---GLVKPWEGERIHEEFGSDDLELTLGNSKTR

```

**Figure S2.** Alignment of amino acid sequences of two soybean BEH3 orthologs (GLYMA\_12G231500 and GLYMA\_13G266500) and *Arabidopsis thaliana* BEH3. Shown are the amino acid sequences of *Glycine max* GLYMA\_12G231500, GLYMA\_13G266500, and *A. thaliana* BEH3 (At4g18890). Black shading describes identical amino acids. Gap (-) is introduced to optimize the amino acid sequence alignment.

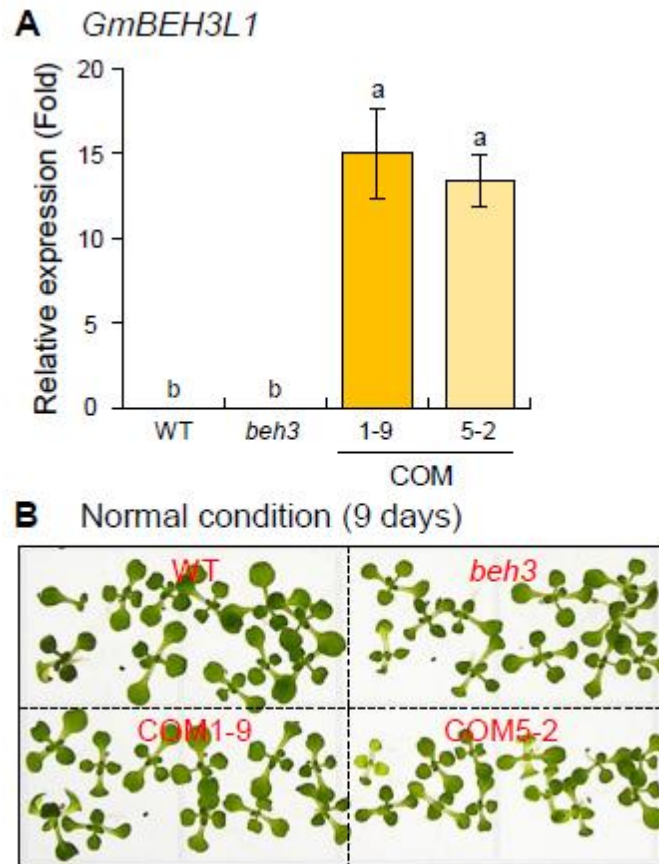

**Figure S3. Genotype analysis of *GmBEH3L1*-expressing complementary lines.** (A) Genotype analysis of WT, *beh3*, and two individual *GmBEH3L1*-expressing complementary (COM1-9 and COM5-2) seedlings. The expression level of the *GmBEH3L1* gene was quantified by qPCR using mRNAs obtained from 10-day-old seedling samples. Error bars represent the standard deviation of three independent biological replications. Lowercase letters indicate significant differences ( $P < 0.05$ ) by Tukey's multiple range test. (B) Photos of WT, *beh3*, and *GmBEH3L1*-expressing complementary (COM1-9 and COM5-2) seedlings at 9 days under the normal condition.
